# Supplementary material for: Antibacterial and anticancer activities of three novel lectin-conjugated chitosan nanoparticles
Source: Springer Nature journal article supplement (doi:10.1007/s00253-024-13344-7), 2024-11-27
Supplement: MOESM1 [file 253_2024_13344_MOESM1_ESM.pdf]

# **Applied Microbiology and Biotechnology**

Antibacterial and anticancer activities of three novel lectin conjugated chitosan nanoparticles.

**\*Mervat Mounir Soliman<sup>1</sup>, Einas Hamed El-Shatoury<sup>1</sup>**

**Magda Mahmoud Ibrahim El-Araby<sup>2</sup>**

<sup>1</sup>Department of Microbiology, Faculty of Science, Ain-Shams University

<sup>2</sup>Department of Botany, Faculty of Science, Ain-Shams University

\* Corresponding author: Emails: [mervatmonir\\_p@sci.edu.eg](mailto:mervatmonir_p@sci.edu.eg) or [mervatmounir84@yahoo.com](mailto:mervatmounir84@yahoo.com), Telephone: 00201141175244

## Antibacterial activity by agar well diffusion

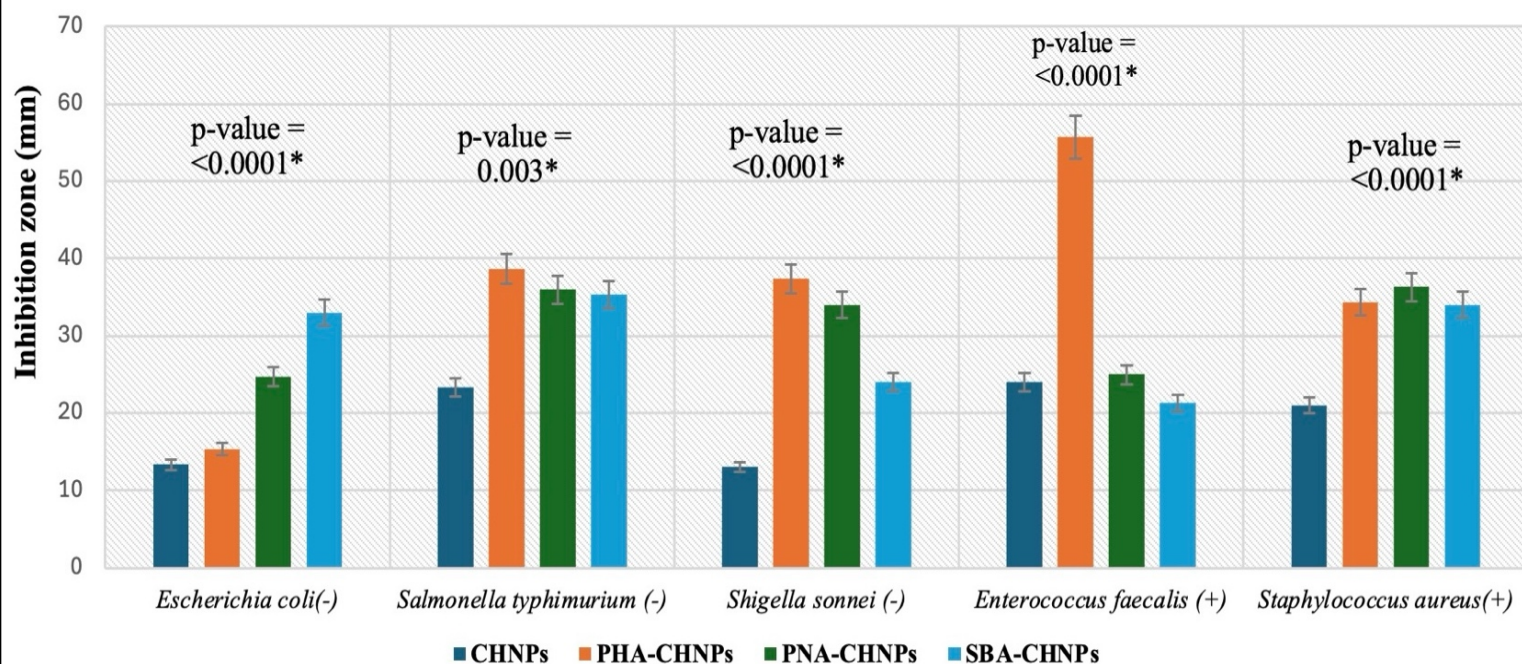

**Figure S1** shows the antibacterial activity of chitosan nanoparticles (CHNPs) of concentration 10 mg/ml and three lectins conjugated chitosan nanoparticles (PHA-CHNPs, SBA-CHNPs, and PNA-CHNPs) using 400  $\mu$ l of glutaraldehyde (%25) against five tested strains Gram-negative bacteria (-) and Gram-positive bacteria. Statistically significant results were observed in all cases, as indicated by the p-values ( $p < 0.05$ ).

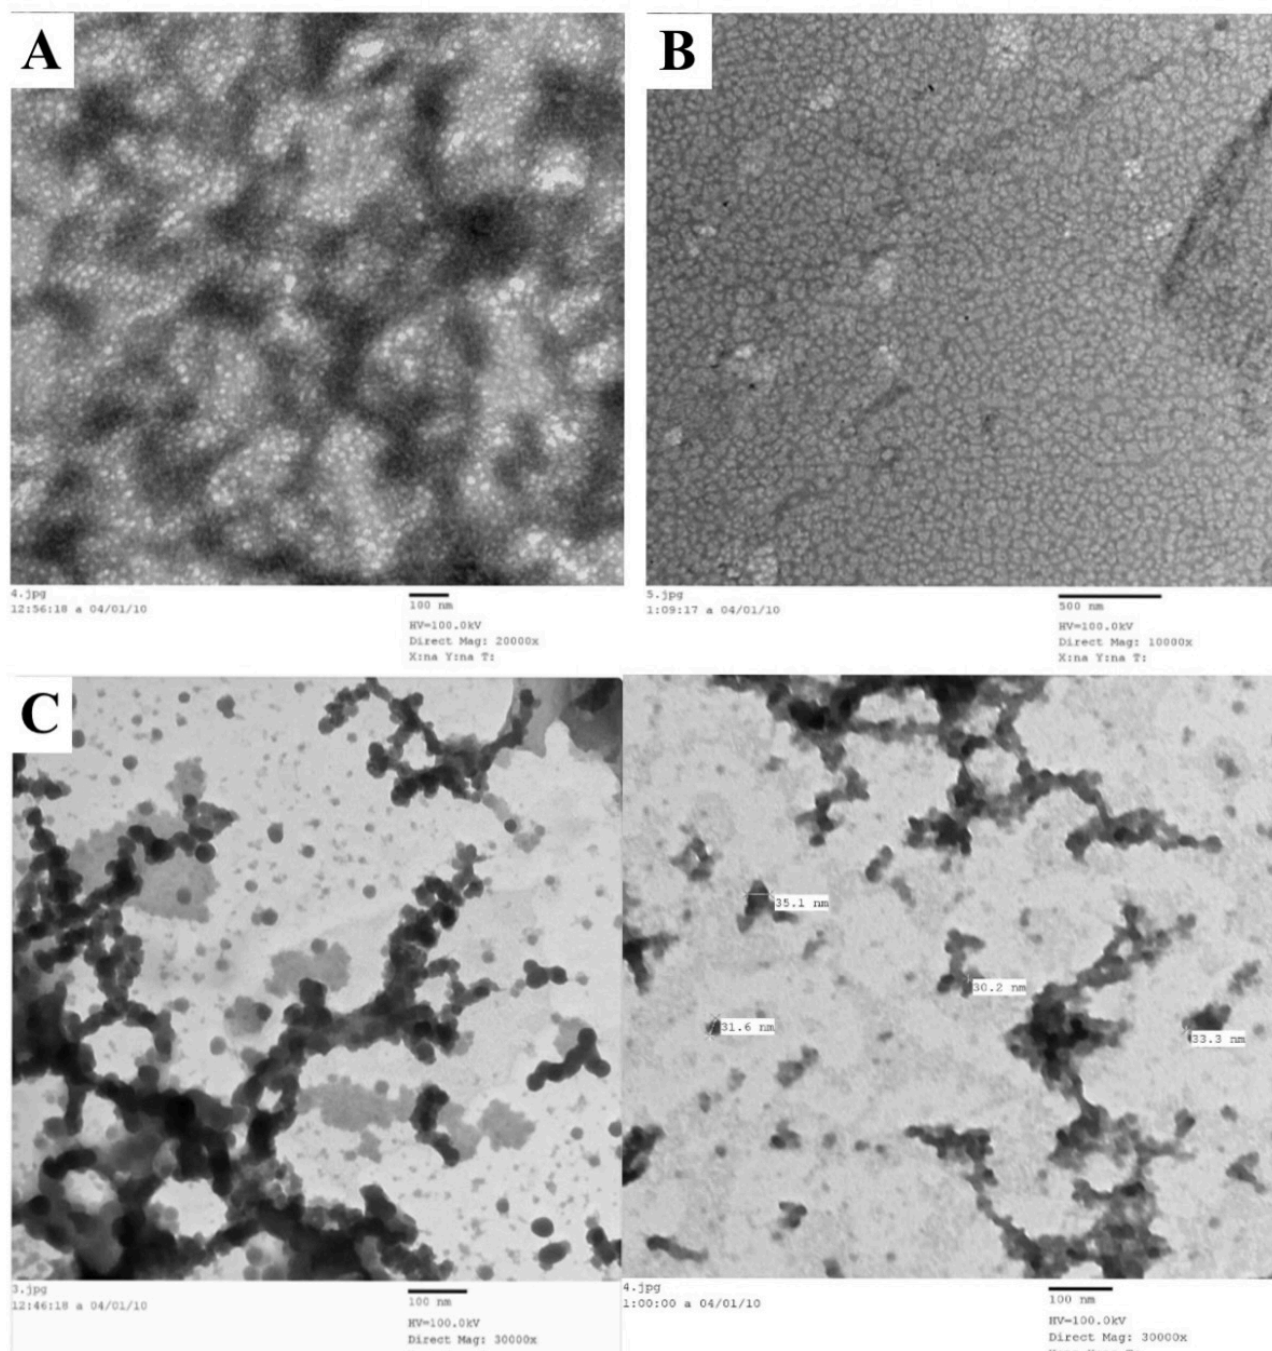

**Figure S2** shows TEM photomicrographs of **A** = chitosan nanoparticles; **B**= pure lectins (PHA); and **C** = lectin conjugated chitosan nanoparticles (**PHA-CHNPs**) using 400  $\mu$ l of 0.25% glutaraldehyde. PHA = phytohaemagglutinin lectin.

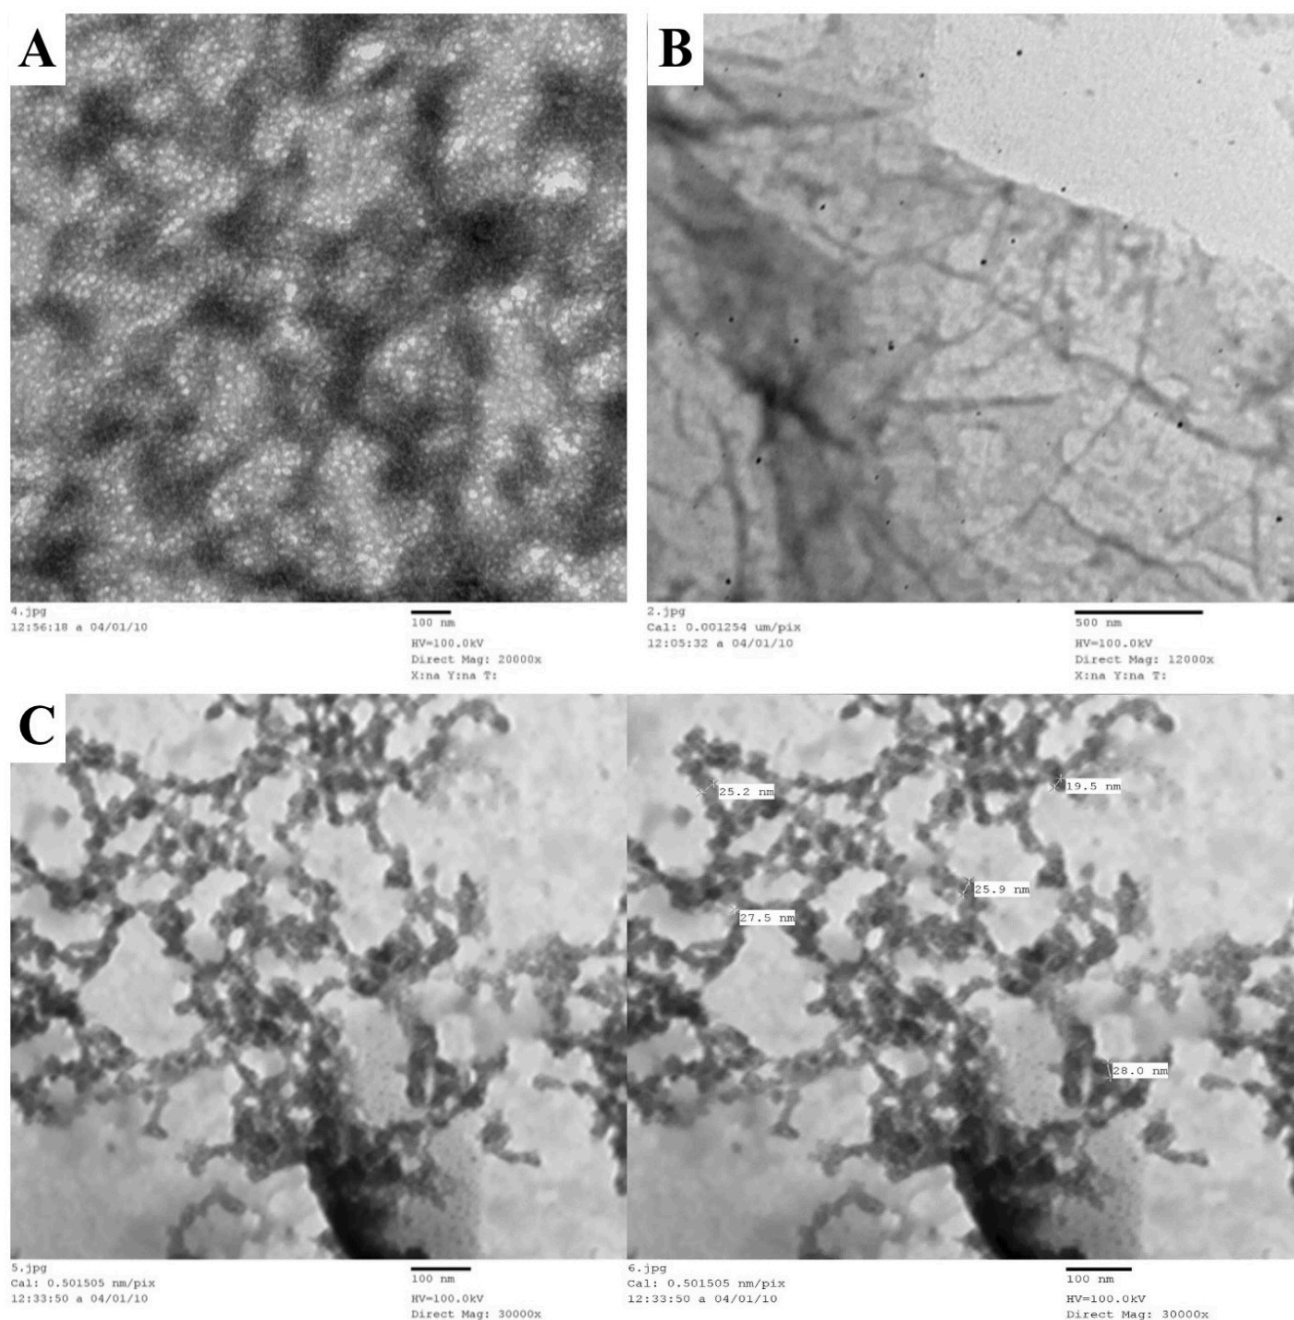

**Figure S3** shows TEM photomicrographs of **A** = chitosan nanoparticles; **B**= pure lectins (PHA); and **C** = lectin conjugated chitosan nanoparticles (**PNA-CHNPs**) using 400  $\mu$ l of 0.25% glutaraldehyde. PNA = peanut agglutinin lectin.

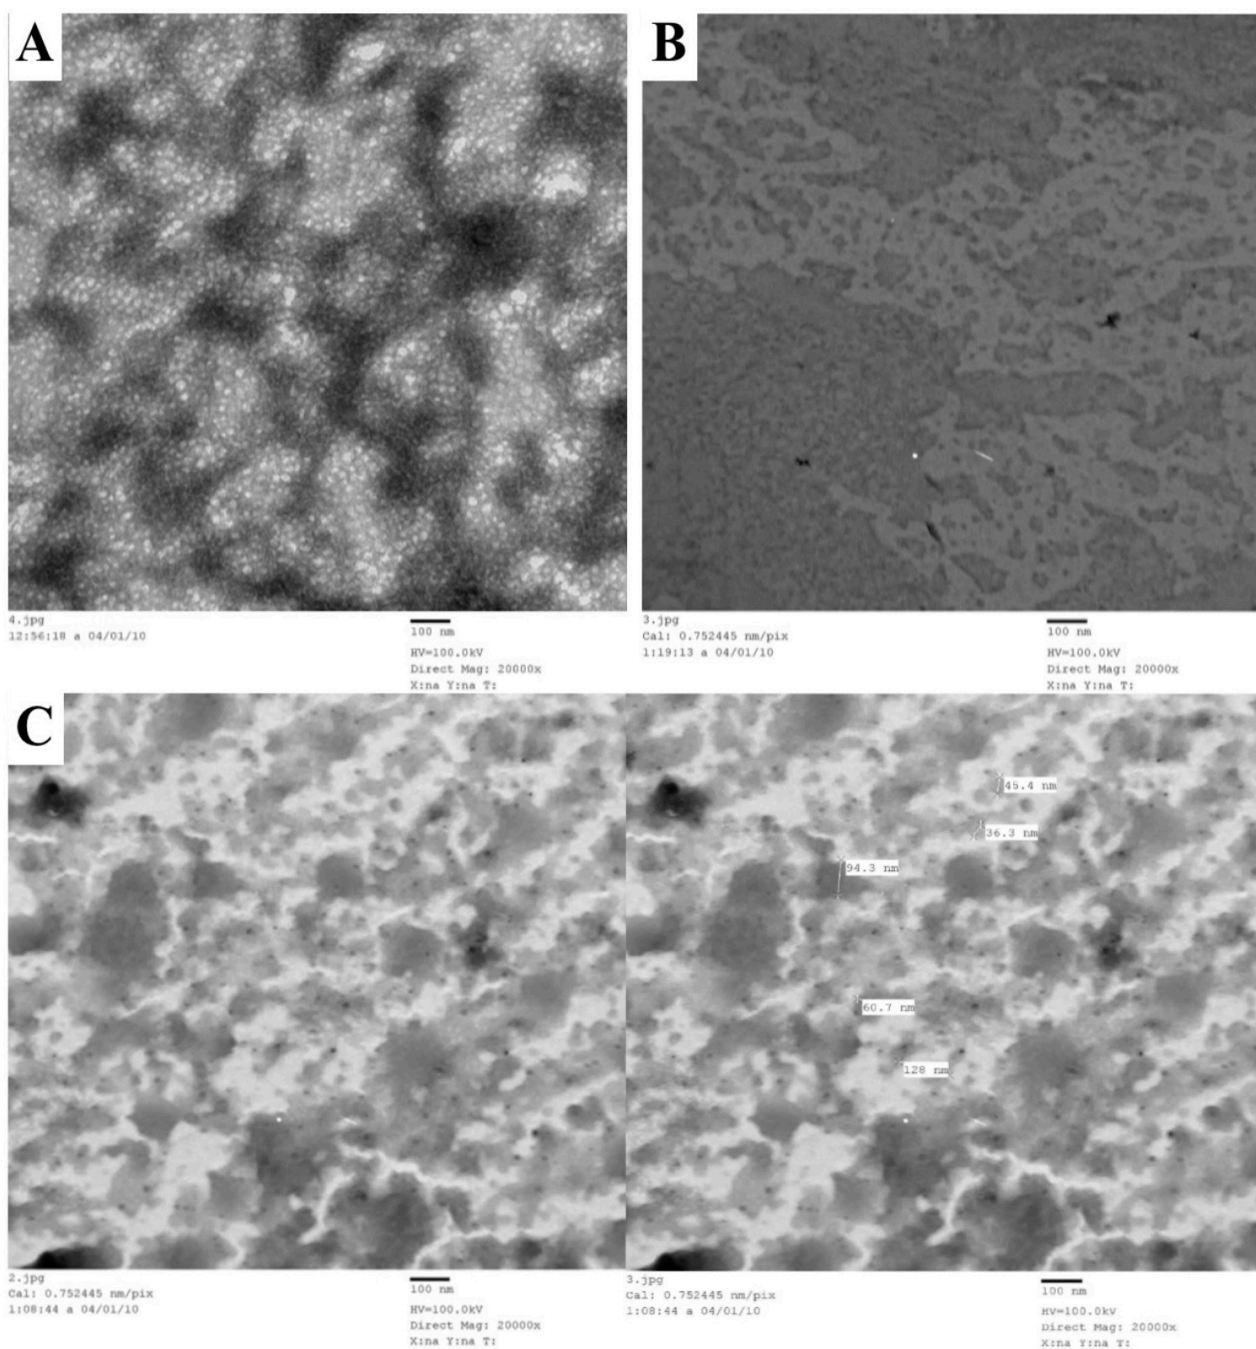

**Figure S4** shows TEM photomicrographs of **A** = chitosan nanoparticles; **B**= pure lectins (PHA); and **C**= lectin conjugated chitosan nanoparticles (**SBA-CHNPs**) using 400  $\mu$ l of 0.25% glutaraldehyde. SBA = soybean agglutinin lectin.



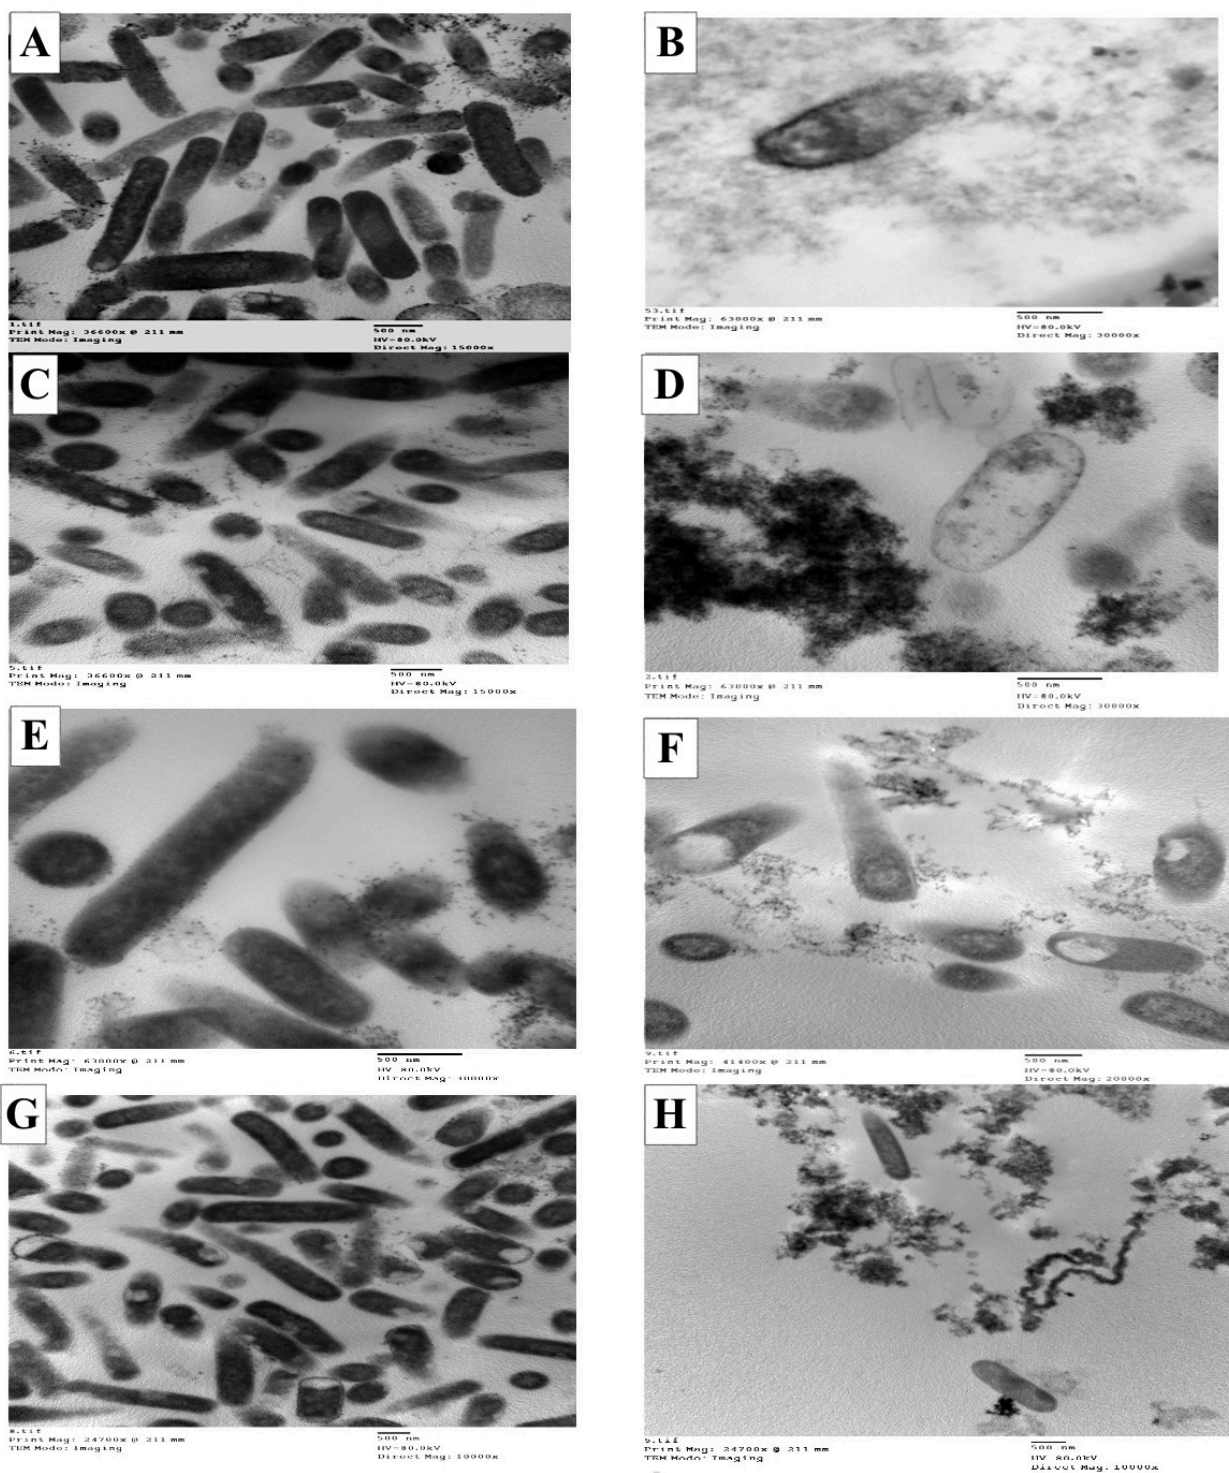

**Figure S5** shows TEM photomicrographs of *Escherichia coli*, A= control without treatment , B=chitosan nanoparticles; C, E, G= pure lectins PHA, PNA, and SBA respectively; D, F, H=lectins conjugated chitosan nanoparticles PHA-CHNPs, PNA-CHNPs, and SBA-CHNPs respectively using 400  $\mu$ l of 0.25% glutaraldehyde. PHA = Phytohaemagglutinin lectin, PNA= Peanut agglutinin lectin, and SBA=Soybean agglutinin lectin.

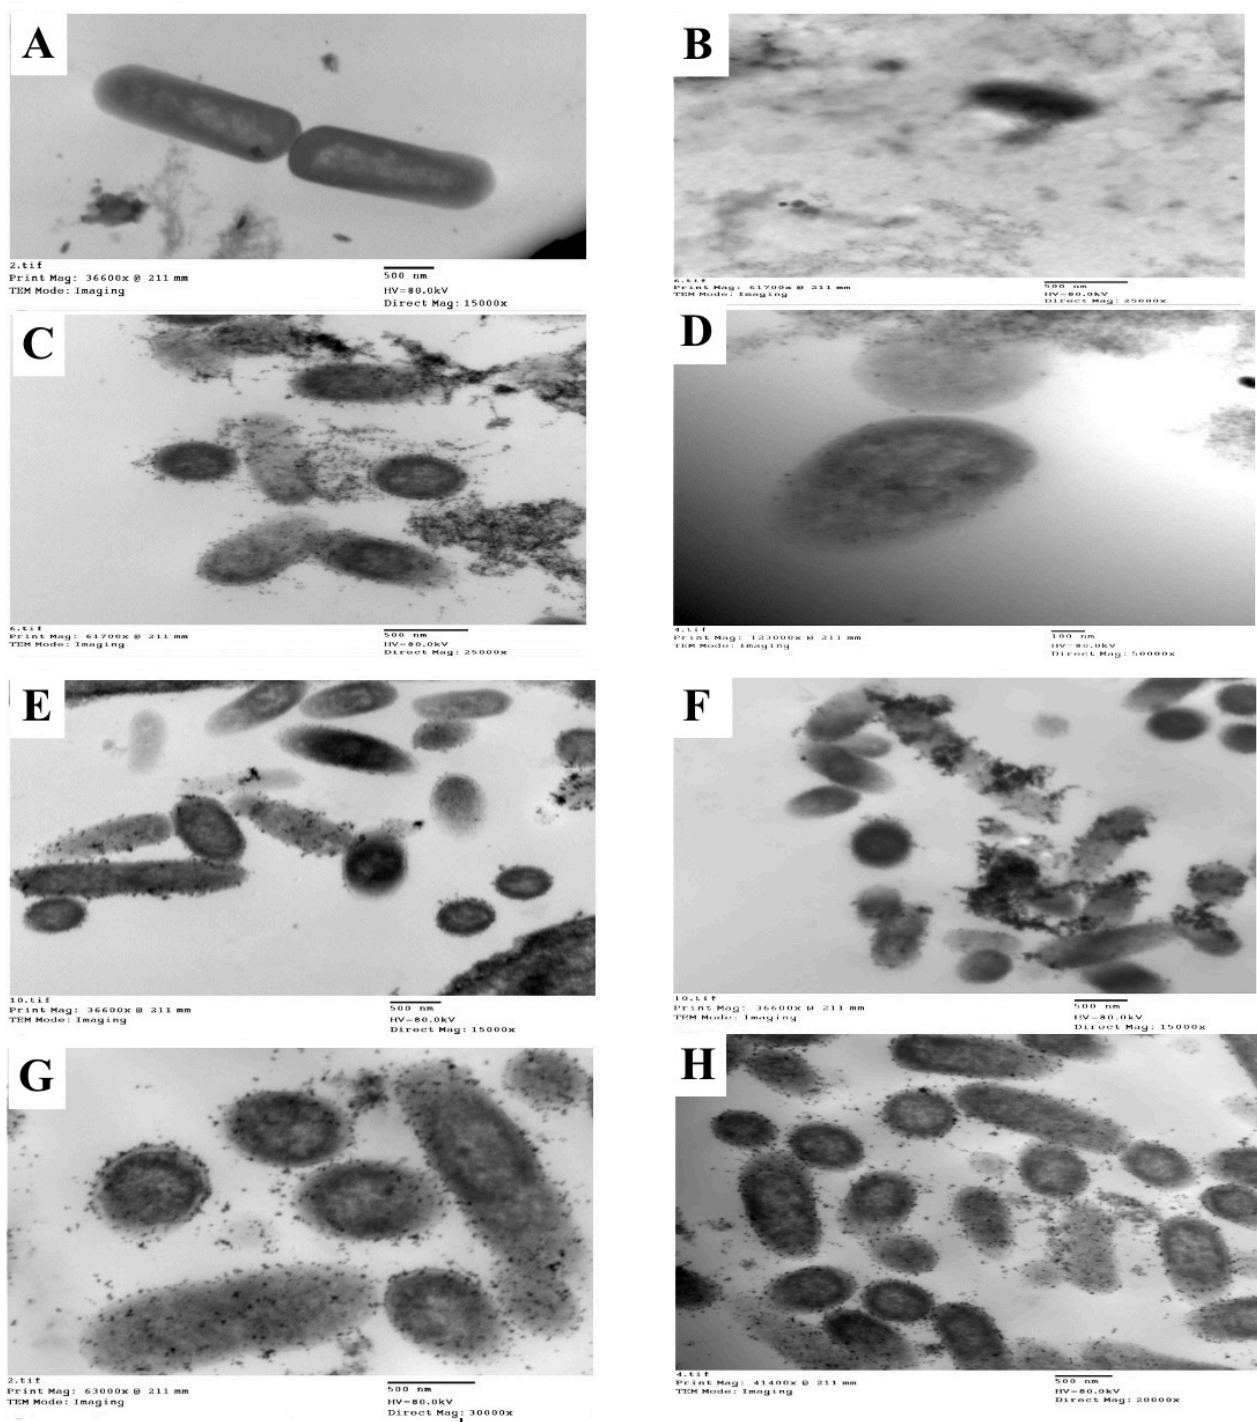

**Figure S6** shows TEM photomicrographs of *Salmonella Typhimurium*, **A**= control without treatment, **B**=chitosan nanoparticles; **C**, **E**, **G** = pure lectins PHA, PNA, and SBA respectively; **D**, **F**, **H** =lectins conjugated chitosan nanoparticles PHA-CHNPs, PNA-CHNPs, and SBA-CHNPs respectively using 400  $\mu$ l of 0.25% glutaraldehyde. PHA = phytohaemagglutinin lectin, PNA= peanut agglutinin lectin, and SBA=soybean agglutinin lectin.

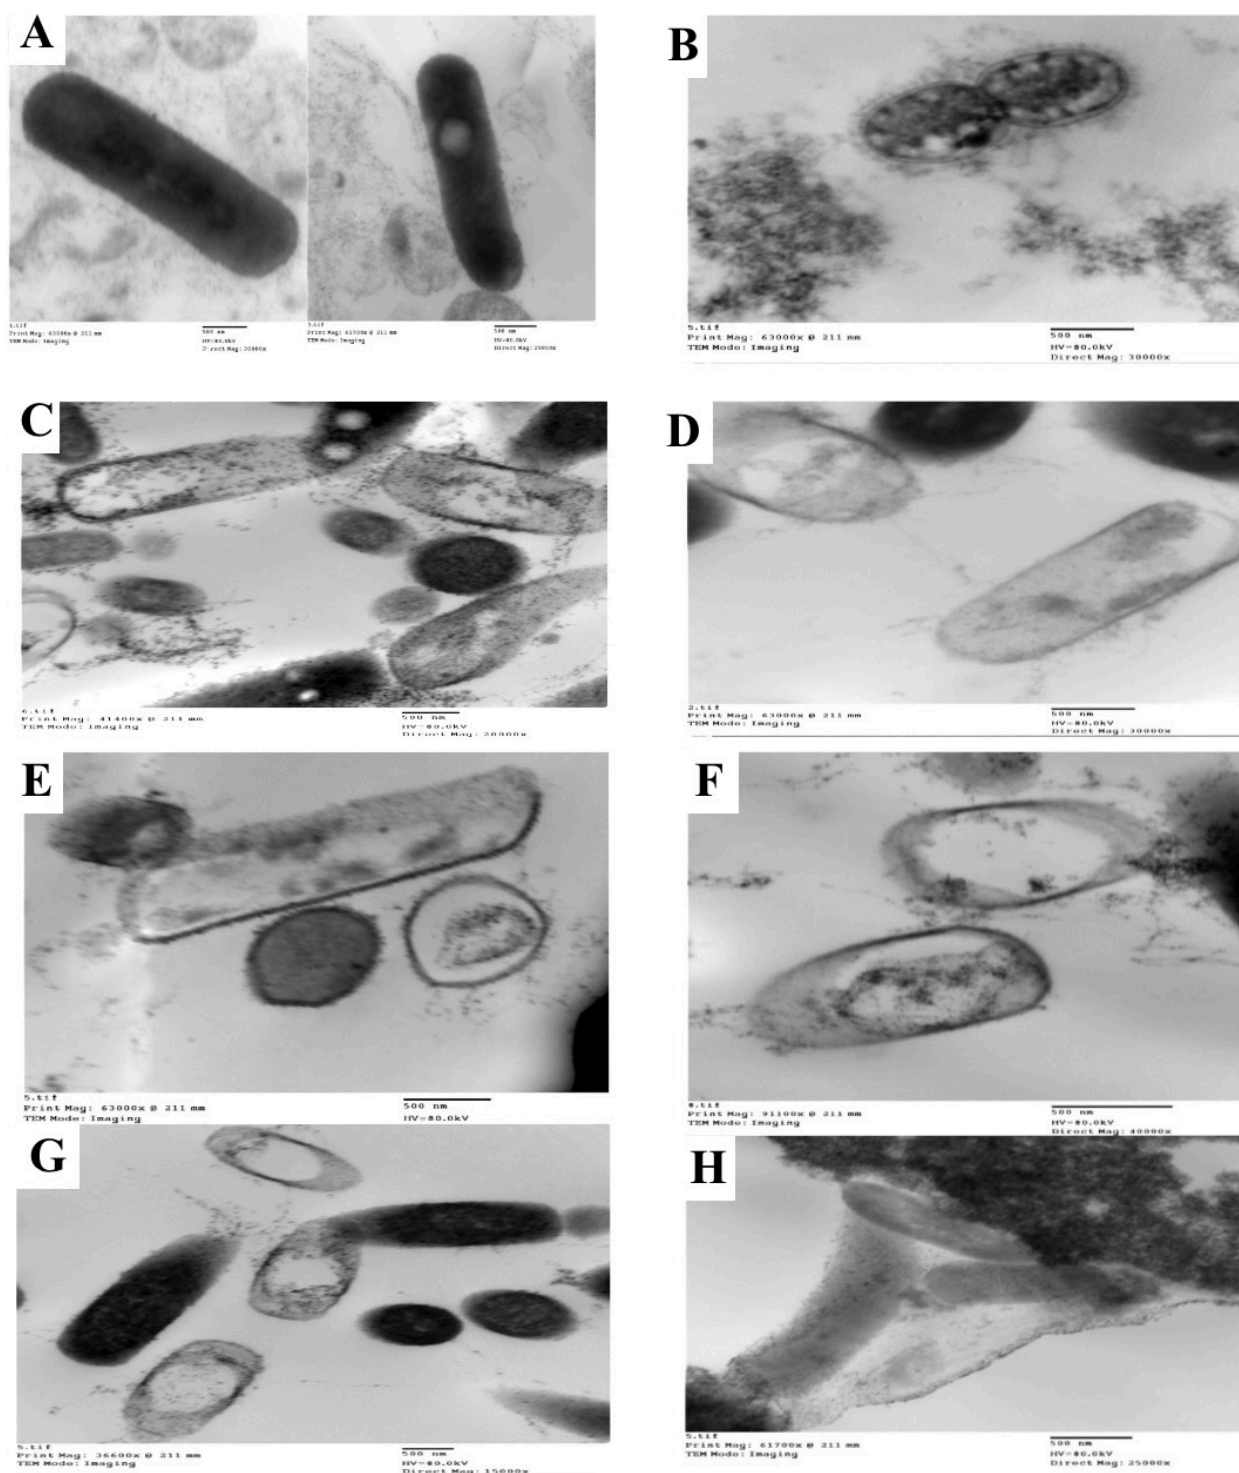

**Figure S7** shows TEM photomicrographs of *Shigella Sonnei*, A= control without treatment , B=chitosan nanoparticles; C, E, G = pure lectins PHA, PNA, and SBA respectively; D, F, H =lectins conjugated chitosan nanoparticles PHA-CHNPs, PNA-CHNPs, and SBA-CHNPs respectively using 400  $\mu$ l of 0.25% glutaraldehyde. PHA = phytohaemagglutinin lectin, PNA= peanut agglutinin lectin, and SBA=soybean agglutinin lectin.



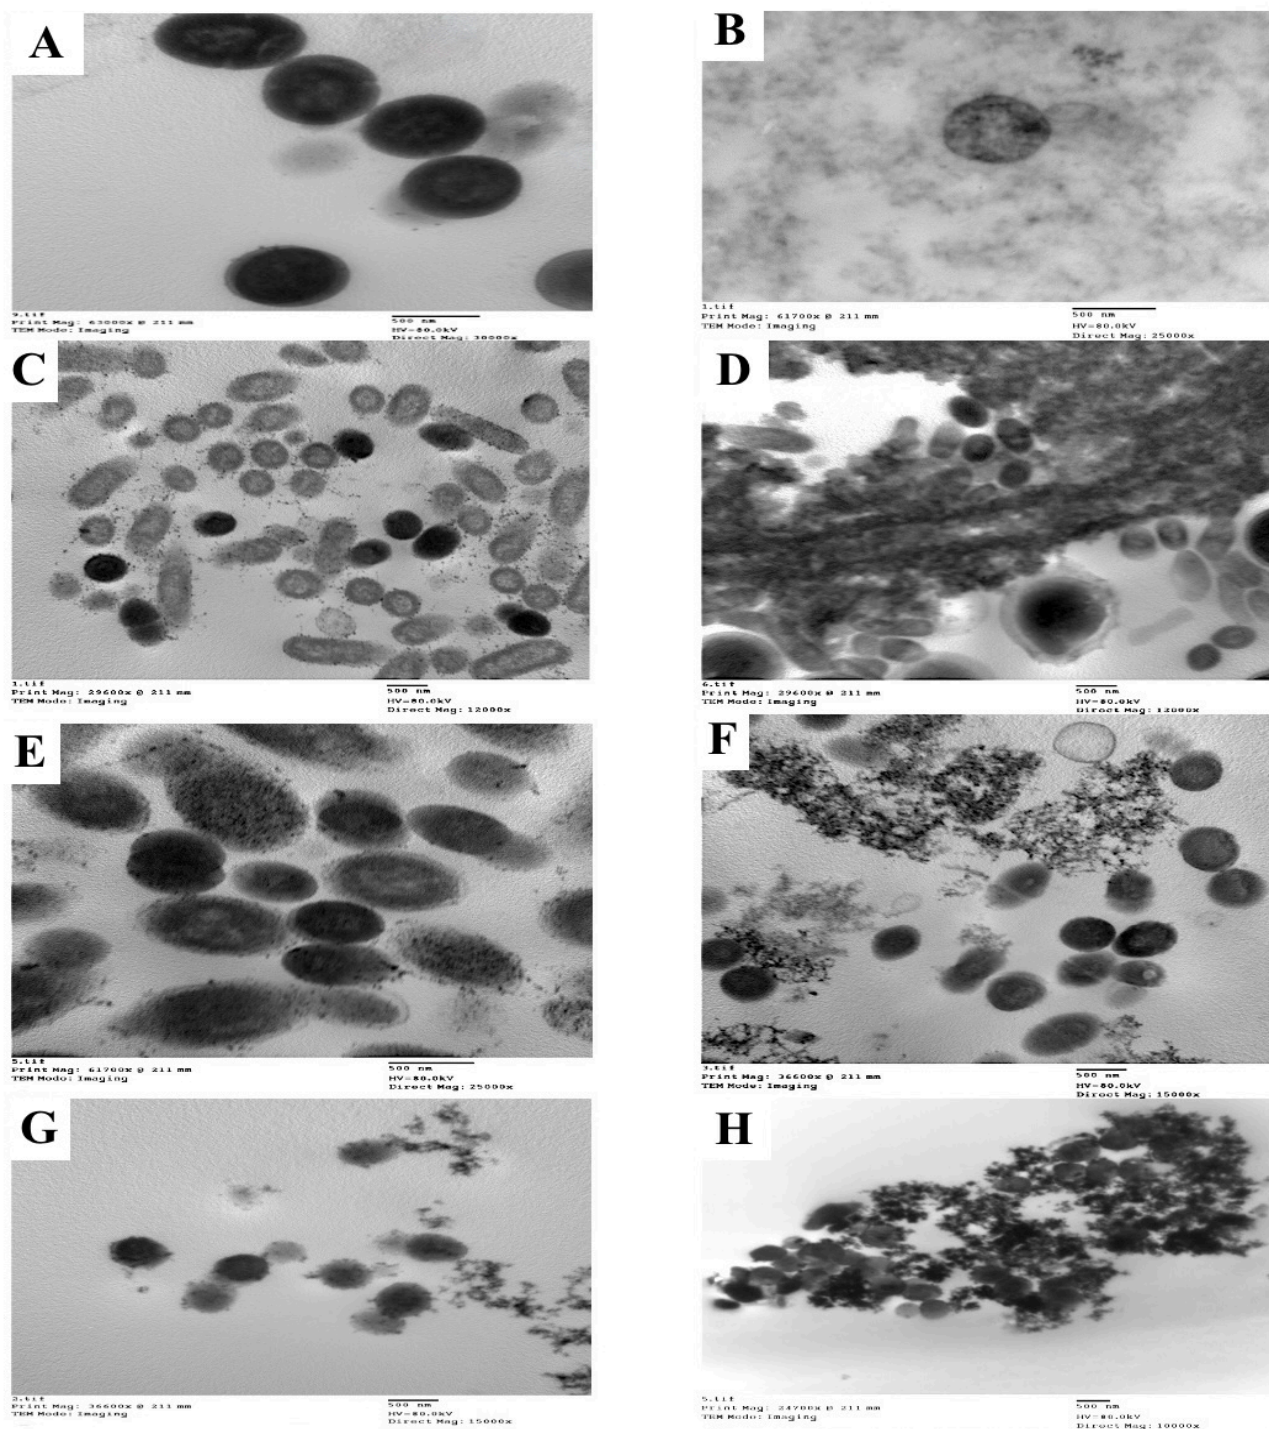

**Figure S8** shows TEM photomicrographs of *Enterococcus faecalis*, **A**= control without treatment, **B**=chitosan nanoparticles **C**, **E**, **G** = pure lectins PHA, PNA, and SBA respectively; **D**, **F**, **H** =lectins conjugated chitosan nanoparticles PHA-CHNPs, PNA-CHNPs, and SBA-CHNPs respectively using 400  $\mu$ l of 0.25% glutaraldehyde. PHA = phytohaemagglutinin lectin, PNA= peanut agglutinin lectin, and SBA=soybean agglutinin lectin.

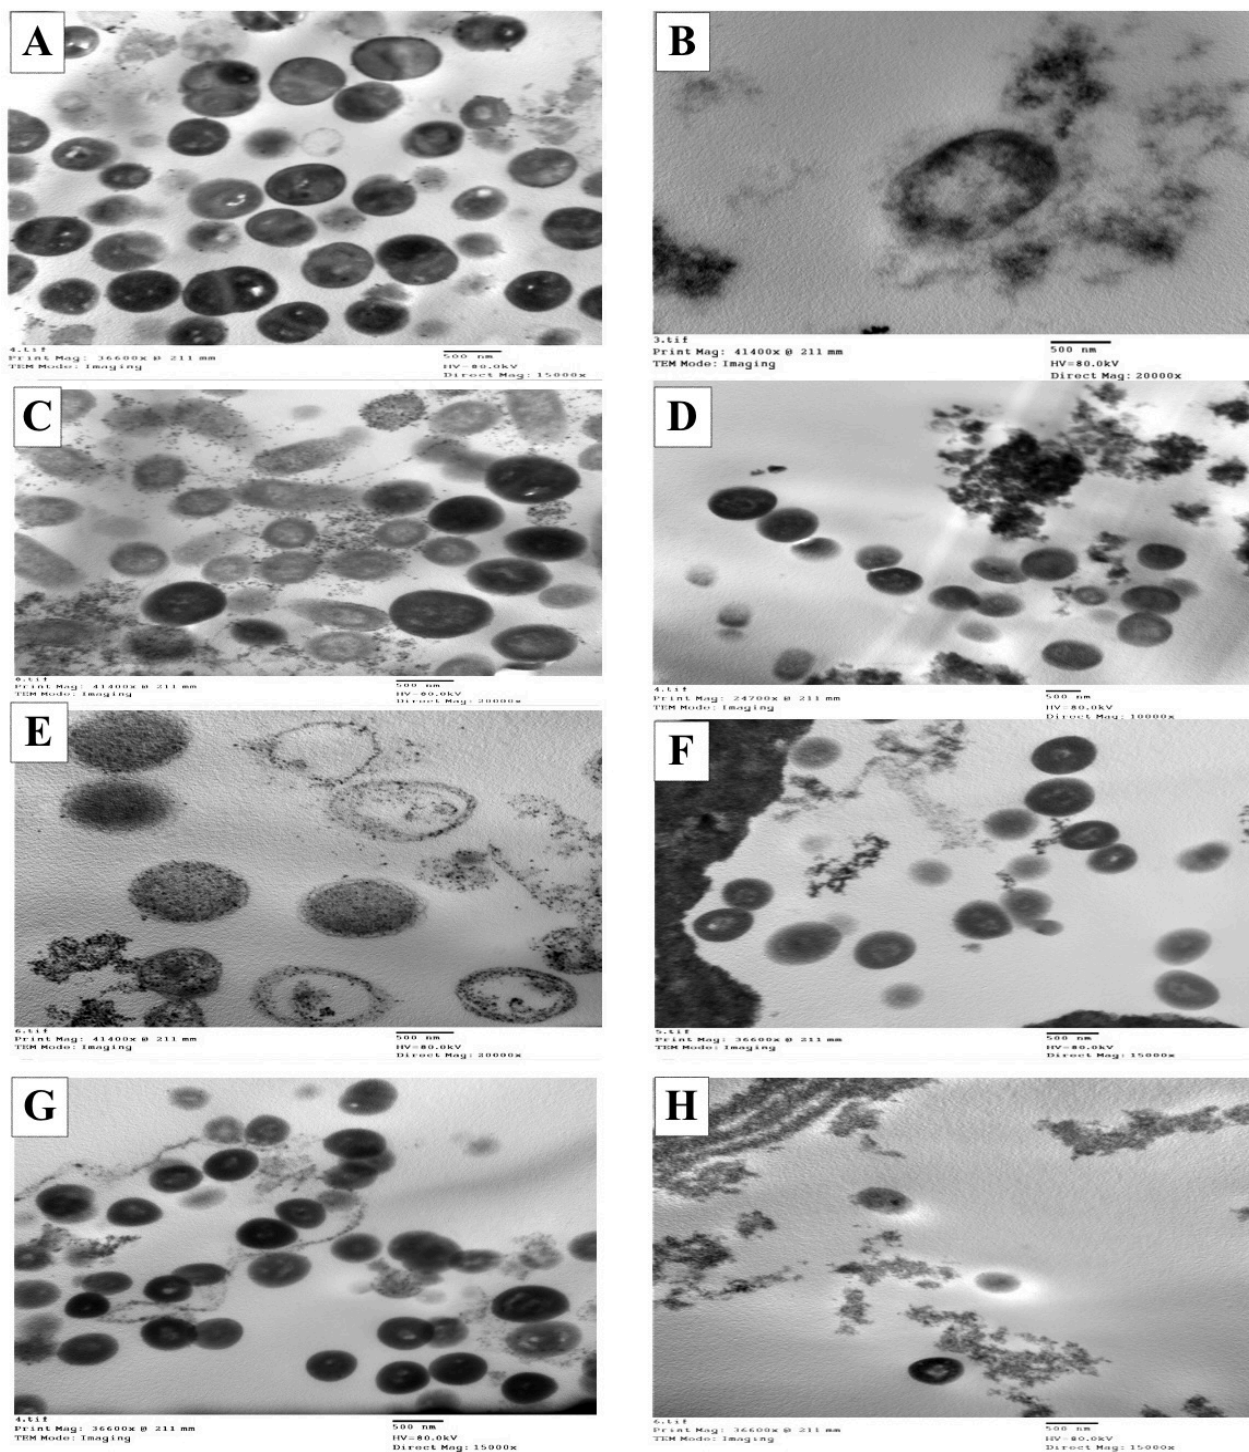

**Figure S9** shows TEM photomicrographs of *Staphylococcus aureus*, **A**= control without treatment, **B**=chitosan nanoparticles; **C**, **E**, **G** = pure lectins PHA, PNA, and SBA respectively; **D**, **F**, **H** =lectins conjugated chitosan nanoparticles PHA-CHNPs, PNA-CHNPs, and SBA-CHNPs respectively using 400  $\mu$ l of 0.25% glutaraldehyde. PHA = phytohaemagglutinin lectin, PNA= peanut agglutinin lectin, and SBA=soybean agglutinin lectin.

**Table S1:** Protein concentration of three lectins conjugated chitosan nanoparticles (PHA-CHNPs, PNA-CHNPs, and SBA-CHNPs) using three volumes (200, 300, and 400) of 0.25% glutaraldehyde after estimation by nanodrop technique.

| Conjugates | Volumes of 0.25% glutaraldehyde | Concentration (mg/ml) |
|------------|---------------------------------|-----------------------|
| PHA -CHNPs | 200                             | 0.066                 |
|            | 300                             | 0.146                 |
|            | 400                             | 0.432                 |
| PNA -CHNPs | 200                             | 0.056                 |
|            | 300                             | 0.181                 |
|            | 400                             | 0.629                 |
| SBA- CHNPs | 200                             | 0.111                 |
|            | 300                             | 0.254                 |
|            | 400                             | 0.960                 |

PHA-CHNPs = Phytohemagglutinin lectin conjugated chitosan nanoparticles

PNA-CHNPs = Peanut agglutinin lectin conjugated chitosan nanoparticles

SBA-CHNPs =Soybean agglutinin lectin conjugated chitosan nanoparticles

**Table S2:** Haemagglutination activity (HA) of three lectins conjugated chitosan nanoparticles (PHA-CHNPs, PNA-CHNPs, and SBA-CHNPs) using 400 µl of 0.25% glutaraldehyde against human blood groups A, B, AB, and O

| Conjugates | Human blood groups                 |     |     |     |
|------------|------------------------------------|-----|-----|-----|
|            | A                                  | B   | AB  | O   |
|            | Haemagglutination Activity (titer) |     |     |     |
| PHA -CHNPs | 256                                | 128 | 128 | 256 |
| PNA- CHNPs | 8                                  | 8   | 16  | 8   |
| SBA- CHNPs | 32                                 | 32  | 64  | 16  |

PHA-CHNPs = Phytohemagglutinin lectin conjugated chitosan nanoparticles

PNA-CHNPs = Peanut agglutinin lectin conjugated chitosan nanoparticles

SBA-CHNPs =Soybean agglutinin lectin conjugated chitosan nanoparticles

Titer = The reciprocal of the heights dilution of protein solution showing visible hemagglutination.
